# Supplementary material for: miRTarBase update 2018: a resource for experimentally validated microRNA-target interactions
Source: Oxford University Press journal article supplement (doi:10.1093/nar/gkx1067), 2017-10-25
Supplement: gkx1067_supp.pdf [file gkx1067_supp.pdf]

## SUPPLEMENTARY DATA

### The Application of miRTarBase in Others Database and Web tools

**Table S2** lists the databases that incorporate miRTarBase which are categorized into six different groups 1) well-known databases; 2) information databases for MTIs; 3) MiRNA target prediction databases; 4) SNP or mutation related databases, 5) pathway related resources, and 6) others database or web tools. In category 1, the well-known databases, including miRBase (1), GeneCards (2), Ensembl (3) and Mouse Genome Database MGI (4) are kept which collect MTIs from miRTarBase as empirical evidence. TarBase (5) is included in category 2, and is considered to be another provider of complete MTIs. Furthermore, the empirical data in miRTarBase are also taken from validated criteria in relevant miRNA databases such as starBase (6), miRGator (7) and TSmiR (8), in terms of CLIP-seq data, gene expression profiles, and tissue specificity, respectively. In category 3, miRWalk2.0 documents the miRNA binding regions from existing target prediction programs to build comparative platforms of binding sites for the promoter, CDS and UTR regions. It also documents experimentally verified MTI information collected from miRTarBase (9). miRGate is a database of human, virus, mouse and rat MTI which is designed to analyze miRNA and gene isoform lists under a common and consistent set of annotations. Our database contains validated MTIs that were included in miRGate as experimentally validated data (10). mirMark is a tool based on machine learning method for miRNA target prediction at the site of UTR regions. The positive dataset used in mirMark is obtained from miRTarBase (11). With regard to the SNP or mutation related databases in category 4, PolymiRTS is a database of DNA variations in the miRNA seed regions of miRNA, as well as experimentally supported MTIs collected from miRecords and miRTarBase (12). SomamiR is a comprehensive database of somatic mutations in cancer from miRNA and target sites, which collects the MTIs from TarBase, miRecords and miRTarBase (13). miRTarBase has been incorporated into an increasing number of biological resources for pathway- and gene regulatory network related resources, such as miRPathDB (14), DIANA-miRPath (15), miRNet (16), and associations of miRNA related

disease, regulatory circuits, and cancer, such as HMDD (17), MAGIA2 (18), NCG (19), which are categorized in group 5 and 6. In brief, miRTarBase performs a significant role in providing validated experimental data. We believe the release of new version will provide great support in updating the databases mentioned above.

## SUPPLEMENTARY FIGURES

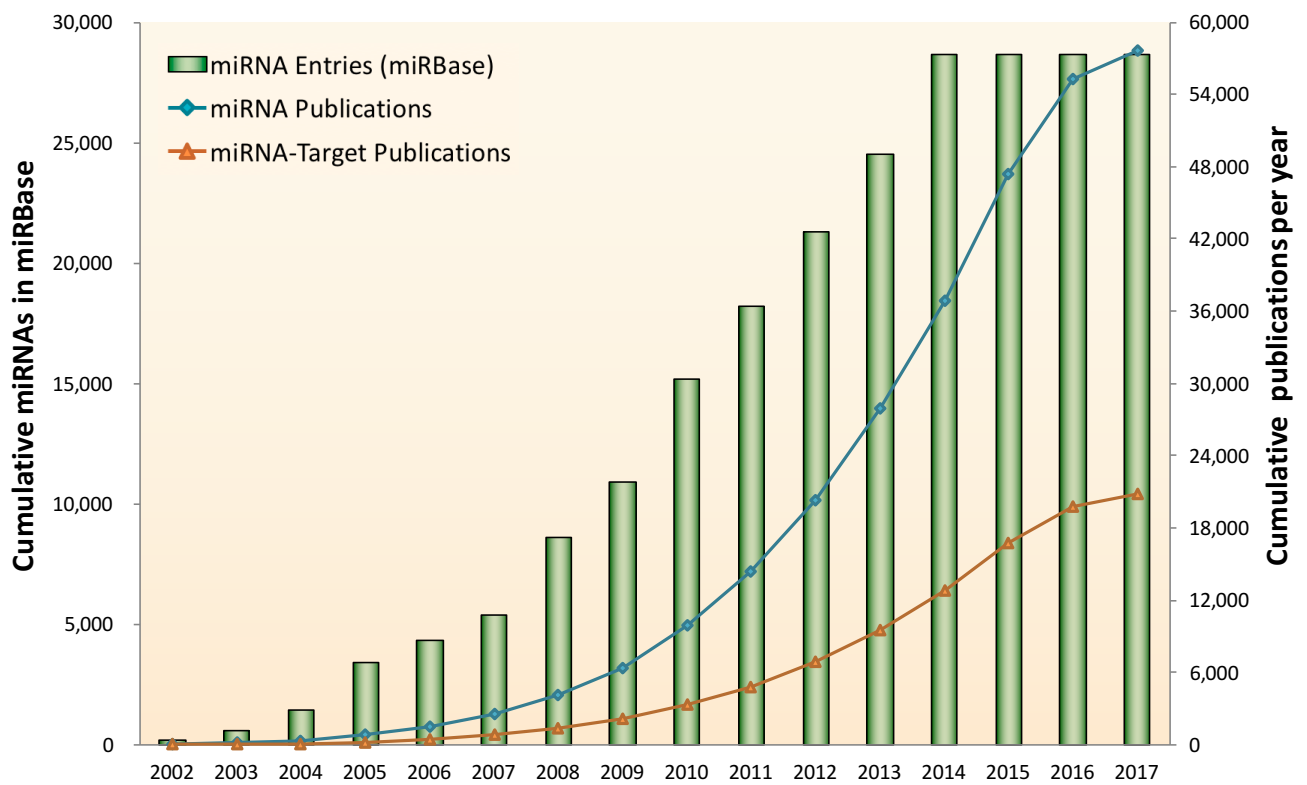

**Figure S1. The growth of miRNA and it's publication.**

The amount of miRNAs collected in miRBase, miRNA publications, and miRNA-target interaction publication collected in PubMed since 2002.

**SUPPLEMENTARY TABLES**

**Table S1.** Update MTI datasets validated by high throughput HITS-CLIP or PAR-CLIP sequencing

| Source                                  | NGS method         | Species    | RBP                | Accession | Samples    | Tissue/cell line | Treatment/Name   |
|-----------------------------------------|--------------------|------------|--------------------|-----------|------------|------------------|------------------|
| Luna, J. M., et al. Mol Cell. 2017 (20) | HITS-CLIP          | Mouse      | AGO2               | GSE97058  | GSM2550642 | Liver            | WT Female 1 CLIP |
|                                         |                    |            |                    |           | GSM2550643 |                  | WT Female 2 CLIP |
|                                         |                    |            |                    |           | GSM2550644 |                  | WT Female 3 CLIP |
|                                         |                    |            |                    |           | GSM2550645 |                  | WT Male 4 CLIP   |
|                                         |                    |            |                    |           | GSM2550646 |                  | WT Male 5 CLIP   |
|                                         |                    |            |                    |           | GSM2550647 |                  | KO Female 1 CLIP |
|                                         |                    |            |                    |           | GSM2550648 |                  | KO Male 2 CLIP   |
|                                         |                    |            |                    |           | GSM2550649 |                  | KO Male 3 CLIP   |
|                                         |                    |            |                    |           | GSM2550650 |                  | KO Male 4 CLIP   |
|                                         |                    |            |                    |           | Human      |                  | AGO2             |
|                                         |                    | GSM2550605 | Patient 1 Normal 2 |           |            |                  |                  |
|                                         |                    | GSM2550606 | Patient 2 Normal 1 |           |            |                  |                  |
|                                         |                    | GSM2550607 | Patient 2 Normal 2 |           |            |                  |                  |
|                                         |                    | GSM2550608 | Patient 3 Normal 1 |           |            |                  |                  |
|                                         |                    | GSM2550609 | Patient 3 Normal 2 |           |            |                  |                  |
|                                         |                    | GSM2550610 | Patient 4 Normal 1 |           |            |                  |                  |
|                                         |                    | GSM2550611 | Patient 4 Normal 2 |           |            |                  |                  |
|                                         |                    | GSM2550612 | Patient 5 Normal 1 |           |            |                  |                  |
|                                         |                    | GSM2550613 | Patient 5 Normal 2 |           |            |                  |                  |
|                                         |                    | GSM2550614 | Patient 6 Normal 1 |           |            |                  |                  |
| GSM2550615                              | Patient 7 Normal 1 |            |                    |           |            |                  |                  |

|                                              |          |       |      |           |            |       |                      |
|----------------------------------------------|----------|-------|------|-----------|------------|-------|----------------------|
|                                              |          |       |      |           | GSM2550616 |       | Patient 8 Normal 1   |
|                                              |          |       |      |           | GSM2550617 |       | Patient 9 Normal 1   |
|                                              |          |       |      |           | GSM2550618 |       | Patient 1 Tumor 1    |
|                                              |          |       |      |           | GSM2550619 |       | Patient 1 Tumor 2    |
|                                              |          |       |      |           | GSM2550620 |       | Patient 2 Tumor 1    |
|                                              |          |       |      |           | GSM2550621 |       | Patient 2 Tumor 2    |
|                                              |          |       |      |           | GSM2550622 |       | Patient 3 Tumor 1    |
|                                              |          |       |      |           | GSM2550623 |       | Patient 3 Tumor 2    |
|                                              |          |       |      |           | GSM2550624 |       | Patient 4 Tumor 1    |
|                                              |          |       |      |           | GSM2550625 |       | Patient 4 Tumor 2    |
|                                              |          |       |      |           | GSM2550626 |       | Patient 5 Tumor 1    |
|                                              |          |       |      |           | GSM2550627 |       | Patient 5 Tumor 2    |
|                                              |          |       |      |           | GSM2550628 |       | Patient 6 Tumor 1    |
|                                              |          |       |      |           | GSM2550629 |       | Patient 7 Tumor 1    |
|                                              |          |       |      |           | GSM2550630 |       | Patient 8 Tumor 1    |
|                                              |          |       |      |           | GSM2550631 |       | Patient 9 Tumor 1    |
| Hamilton, M. P., et al. Neoplasia. 2016 (21) | PAR-CLIP | Human | AGO2 | SRP075075 | SRX1760641 | LNCaP | AGO-CLIP-LNCaP-MDV_B |
|                                              |          |       |      |           | SRX1760639 | LNCaP | AGO-CLIP-LNCaP-MDV_A |
|                                              |          |       |      |           | SRX1760638 | PC3   | AGO-CLIP-PC3-miR148  |
|                                              |          |       |      |           | SRX1760637 | DU145 | AGO-CLIP-DU145_A     |
|                                              |          |       |      |           | SRX1760632 | 22RV1 | AGO-CLIP-22RV1_C     |
|                                              |          |       |      |           | SRX1760631 | 22RV1 | AGO-CLIP-22RV1_B     |
|                                              |          |       |      |           | SRX1760630 | 22RV1 | AGO-CLIP-22RV1_A     |
|                                              |          |       |      |           | SRX1760628 | LAPC4 | AGO-CLIP-LAPC4_B     |
|                                              |          |       |      |           | SRX1760620 | LAPC4 | AGO-CLIP-LAPC4_A     |
|                                              |          |       |      |           | SRX1760618 | PC3   | AGO-CLIP-PC3_B       |

|                                               |                     |       |      |           |            |        |                     |
|-----------------------------------------------|---------------------|-------|------|-----------|------------|--------|---------------------|
|                                               |                     |       |      |           | SRX1760616 | PC3    | AGO-CLIP-PC3_A      |
|                                               |                     |       |      |           | SRX1760597 | LNCaP  | AGO-CLIP-LNCaP_C    |
|                                               |                     |       |      |           | SRX1760591 | LNCaP  | AGO-CLIP-LNCaP_B    |
|                                               |                     |       |      |           | SRX1760583 | LNCaP  | AGO-CLIP-LNCaP_A    |
| Krell, J., et al.<br>Genome Res. 2016<br>(22) | HITS-CLIP           | Human | AGO2 | PRJEB3396 | ERX177599  | HCT116 | p53_D_AGO_CLIP_2_1  |
|                                               |                     |       |      |           | ERX177600  |        | p53_V_Ago_CLIP_2_2  |
|                                               |                     |       |      |           | ERX177601  |        | KO_D_Ago_CLIP_2_3   |
|                                               |                     |       |      |           | ERX177602  |        | KO_V_AGO_CLIP_2_4   |
|                                               |                     |       |      |           | ERX177603  |        | p53_D_AGO_CLIP_2_5  |
|                                               |                     |       |      |           | ERX177604  |        | p53_V_AGO_CLIP_2_6  |
|                                               |                     |       |      |           | ERX177605  |        | KO_D_AGO_CLIP_2_7   |
|                                               |                     |       |      |           | ERX177606  |        | KO_V_AGO_CLIP_2_8   |
|                                               |                     |       |      |           | ERX177607  |        | p53_D_AGO_CLIP_2_9  |
|                                               |                     |       |      |           | ERX177608  |        | p53_V_AGO_CLIP_2_10 |
|                                               |                     |       |      |           | ERX177609  |        | KO_D_AGO_CLIP_2_11  |
|                                               |                     |       |      |           | ERX177610  |        | KO_V_AGO_CLIP_2_12  |
|                                               |                     |       |      |           | ERX177611  |        | p53_D_AGO_CLIP_3_1  |
|                                               |                     |       |      |           | ERX177612  |        | p53_V_AGO_CLIP_3_2  |
|                                               |                     |       |      |           | ERX177613  |        | KO_D_AGO_CLIP_3_3   |
|                                               |                     |       |      |           | ERX177614  |        | KO_V_AGO_CLIP_3_4   |
|                                               |                     |       |      |           | ERX177615  |        | p53_D_AGO_CLIP_3_5  |
|                                               |                     |       |      |           | ERX177616  |        | p53_V_AGO_CLIP_3_6  |
|                                               |                     |       |      |           | ERX177617  |        | KO_D_AGO_CLIP_3_7   |
|                                               |                     |       |      |           | ERX177618  |        | KO_V_AGO_CLIP_3_8   |
| ERX177619                                     | p53_D_AGO_CLIP_3_9  |       |      |           |            |        |                     |
| ERX177620                                     | p53_V_AGO_CLIP_3_10 |       |      |           |            |        |                     |

|                                                           |           |       |      |          |            |                |                                |
|-----------------------------------------------------------|-----------|-------|------|----------|------------|----------------|--------------------------------|
|                                                           |           |       |      |          | ERX177621  |                | KO_D_AGO_CLIP_3_11             |
|                                                           |           |       |      |          | ERX177622  |                | KO_V_AGO_CLIP_3_12             |
|                                                           |           |       |      |          | ERX177623  |                | p53_D_AGO_CLIP_4_1             |
|                                                           |           |       |      |          | ERX177624  |                | p53_V_AGO_CLIP_4_2             |
|                                                           |           |       |      |          | ERX177625  |                | KO_D_AGO_CLIP_4_3              |
|                                                           |           |       |      |          | ERX177626  |                | KO_V_AGO_CLIP_4_4              |
|                                                           |           |       |      |          | ERX177627  |                | p53_D_AGO_CLIP_4_5             |
|                                                           |           |       |      |          | ERX177628  |                | p53_V_AGO_CLIP_4_6             |
|                                                           |           |       |      |          | ERX177629  |                | KO_D_AGO_CLIP_4_7              |
|                                                           |           |       |      |          | ERX177630  |                | KO_V_AGO_CLIP_4_8              |
|                                                           |           |       |      |          | ERX177631  |                | p53_D_AGO_CLIP_4_9             |
|                                                           |           |       |      |          | ERX177632  |                | p53_V_AGO_CLIP_4_10            |
|                                                           |           |       |      |          | ERX177633  |                | KO_D_AGO_CLIP_4_11             |
|                                                           |           |       |      |          | ERX177634  |                | KO_V_AGO_CLIP_4_12             |
| Spengler, R. M., et al.<br>Nucleic Acids Res<br>2016 (23) | HITS-CLIP | Human | AGO2 | GSE83410 | GSM2202476 | Cardiac tissue | S1_LV_54yo_Male_AGO2_bound_RNA |
|                                                           |           |       |      |          | GSM2202477 |                | S2_LV_25yo_Male_AGO2_bound_RNA |
|                                                           |           |       |      |          | GSM2202478 |                | S3_LV_36yo_Male_AGO2_bound_RNA |
|                                                           |           |       |      |          | GSM2202479 |                | S4_LV_29yo_Male_AGO2_bound_RNA |
|                                                           |           |       |      |          | GSM2202480 |                | S5_LV_36yo_Male_AGO2_bound_RNA |
|                                                           |           |       |      |          | GSM2202481 |                | S6_LV_61yo_Male_AGO2_bound_RNA |

**Table S2.** A list of resources that incorporate miRTarBase.

| <b>Type of resources</b>                 | <b>Database names</b>                              |
|------------------------------------------|----------------------------------------------------|
| <b>Well-known databases</b>              | miRBase (1), GeneCards (2), Ensembl (3), MGI (4)   |
| <b>Information databases for MTIs</b>    | Tarbase (5), starBase (6), miRGator (7), TSmiR (8) |
| <b>MiRNA target prediction databases</b> | miRWalk (9), miRGate (10), mirMark (11)            |
| <b>SNP or mutation related databases</b> | PolymiRTS (12), SomamiR (13)                       |
| <b>Pathway related resources</b>         | MiRPathDB (14), DIANA-miRPath (15), miRNet (16)    |
| <b>Others Database or Web tools</b>      | HMDD (17), MAGIA2 (18), NCG (19)                   |



## REFERENCES

1. Kozomara, A. and Griffiths-Jones, S. (2014) miRBase: annotating high confidence microRNAs using deep sequencing data. *Nucleic Acids Res*, **42**, D68-73.
2. Safran, M., Dalah, I., Alexander, J., Rosen, N., Iny Stein, T., Shmoish, M., Nativ, N., Bahir, I., Doniger, T., Krug, H. *et al.* (2010) GeneCards Version 3: the human gene integrator. *Database (Oxford)*, **2010**, baq020.
3. Yates, A., Akanni, W., Amode, M.R., Barrell, D., Billis, K., Carvalho-Silva, D., Cummins, C., Clapham, P., Fitzgerald, S., Gil, L. *et al.* (2016) Ensembl 2016. *Nucleic Acids Res*, **44**, D710-716.
4. Eppig, J.T., Blake, J.A., Bult, C.J., Kadin, J.A., Richardson, J.E. and Mouse Genome Database, G. (2015) The Mouse Genome Database (MGD): facilitating mouse as a model for human biology and disease. *Nucleic Acids Res*, **43**, D726-736.
5. Vlachos, I.S., Paraskevopoulou, M.D., Karagkouni, D., Georgakilas, G., Vergoulis, T., Kanellos, I., Anastasopoulos, I.L., Maniou, S., Karathanou, K., Kalfakakou, D. *et al.* (2015) DIANA-TarBase v7.0: indexing more than half a million experimentally supported miRNA:mRNA interactions. *Nucleic Acids Res*, **43**, D153-159.
6. Li, J.H., Liu, S., Zhou, H., Qu, L.H. and Yang, J.H. (2014) starBase v2.0: decoding miRNA-ceRNA, miRNA-ncRNA and protein-RNA interaction networks from large-scale CLIP-Seq data. *Nucleic Acids Res*, **42**, D92-97.
7. Cho, S., Jang, I., Jun, Y., Yoon, S., Ko, M., Kwon, Y., Choi, I., Chang, H., Ryu, D., Lee, B. *et al.* (2013) MiRGator v3.0: a microRNA portal for deep sequencing, expression profiling and mRNA targeting. *Nucleic Acids Res*, **41**, D252-257.
8. Guo, Z., Maki, M., Ding, R., Yang, Y., Zhang, B. and Xiong, L. (2014) Genome-wide survey of tissue-specific microRNA and transcription factor regulatory networks in 12 tissues. *Sci Rep*, **4**, 5150.
9. Dweep, H., Sticht, C., Pandey, P. and Gretz, N. (2011) miRWalk--database: prediction of possible miRNA binding sites by "walking" the genes of three genomes. *Journal of biomedical informatics*, **44**, 839-847.
10. Andres-Leon, E., Gonzalez Pena, D., Gomez-Lopez, G. and Pisano, D.G. (2015) miRGate: a curated database of human, mouse and rat miRNA-mRNA targets. *Database (Oxford)*, **2015**, bav035.
11. Menor, M., Ching, T., Zhu, X., Garmire, D. and Garmire, L.X. (2014) mirMark: a site-level and UTR-level classifier for miRNA target prediction. *Genome Biol*, **15**, 500.
12. Bhattacharya, A., Ziebarth, J.D. and Cui, Y. (2014) PolymiRTS Database 3.0: linking polymorphisms in microRNAs and their target sites with human diseases and biological pathways. *Nucleic Acids Res*, **42**, D86-91.
13. Bhattacharya, A. and Cui, Y. (2016) SomamiR 2.0: a database of cancer somatic mutations altering microRNA-ceRNA interactions. *Nucleic Acids Res*, **44**, D1005-1010.
14. Backes, C., Kehl, T., Stockel, D., Fehlmann, T., Schneider, L., Meese, E., Lenhof, H.P. and Keller, A. (2017) miRPathDB: a new dictionary on microRNAs and target pathways. *Nucleic Acids Res*, **45**, D90-D96.
15. Vlachos, I.S., Zagkanas, K., Paraskevopoulou, M.D., Georgakilas, G., Karagkouni, D., Vergoulis, T., Dalamagas, T. and Hatzigeorgiou, A.G. (2015) DIANA-miRPath v3.0: deciphering microRNA function with experimental support. *Nucleic Acids Res*, **43**, W460-466.
16. Fan, Y., Siklenka, K., Arora, S.K., Ribeiro, P., Kimmins, S. and Xia, J. (2016) miRNet - dissecting miRNA-target interactions and functional associations through network-based visual analysis. *Nucleic Acids Res*, **44**, W135-141.
17. Li, Y., Qiu, C., Tu, J., Geng, B., Yang, J., Jiang, T. and Cui, Q. (2014) HMDD v2.0: a database for experimentally supported human microRNA and disease associations. *Nucleic Acids Res*, **42**, D1070-1074.
18. Bisognin, A., Sales, G., Coppe, A., Bortoluzzi, S. and Romualdi, C. (2012) MAGIA(2): from miRNA and genes expression data integrative analysis to microRNA-transcription factor mixed regulatory circuits (2012 update). *Nucleic Acids Res*, **40**, W13-21.
19. An, O., Dall'Olio, G.M., Mourikis, T.P. and Ciccarelli, F.D. (2016) NCG 5.0: updates of a manually curated repository of cancer genes and associated properties from cancer mutational screenings. *Nucleic Acids Res*, **44**, D992-999.
20. Luna, J.M., Barajas, J.M., Teng, K.Y., Sun, H.L., Moore, M.J., Rice, C.M., Darnell, R.B. and Ghoshal, K.

- (2017) Argonaute CLIP Defines a Deregulated miR-122-Bound Transcriptome that Correlates with Patient Survival in Human Liver Cancer. *Molecular cell*, **67**, 400-410.e407.
21. Hamilton, M.P., Rajapakshe, K.I., Bader, D.A., Cerne, J.Z., Smith, E.A., Coarfa, C., Hartig, S.M. and McGuire, S.E. (2016) The Landscape of microRNA Targeting in Prostate Cancer Defined by AGO-PAR-CLIP. *Neoplasia (New York, N.Y.)*, **18**, 356-370.
  22. Krell, J., Stebbing, J., Carissimi, C., Dabrowska, A.F., de Giorgio, A., Frampton, A.E., Harding, V., Fulci, V., Macino, G., Colombo, T. *et al.* (2016) TP53 regulates miRNA association with AGO2 to remodel the miRNA-mRNA interaction network. *Genome research*, **26**, 331-341.
  23. Spengler, R.M., Zhang, X., Cheng, C., McLendon, J.M., Skeie, J.M., Johnson, F.L., Davidson, B.L. and Boudreau, R.L. (2016) Elucidation of transcriptome-wide microRNA binding sites in human cardiac tissues by Ago2 HITS-CLIP. *Nucleic acids research*, **44**, 7120-7131.
